# Supplementary material for: Physicochemical and Structural Properties of Gluten-Konjac glucomannan Conjugates Prepared by Maillard Reaction
Source: MDPI journal article supplement (doi:10.3390/polym15030631), 2023-01-26
Supplement: s1 [file s1]

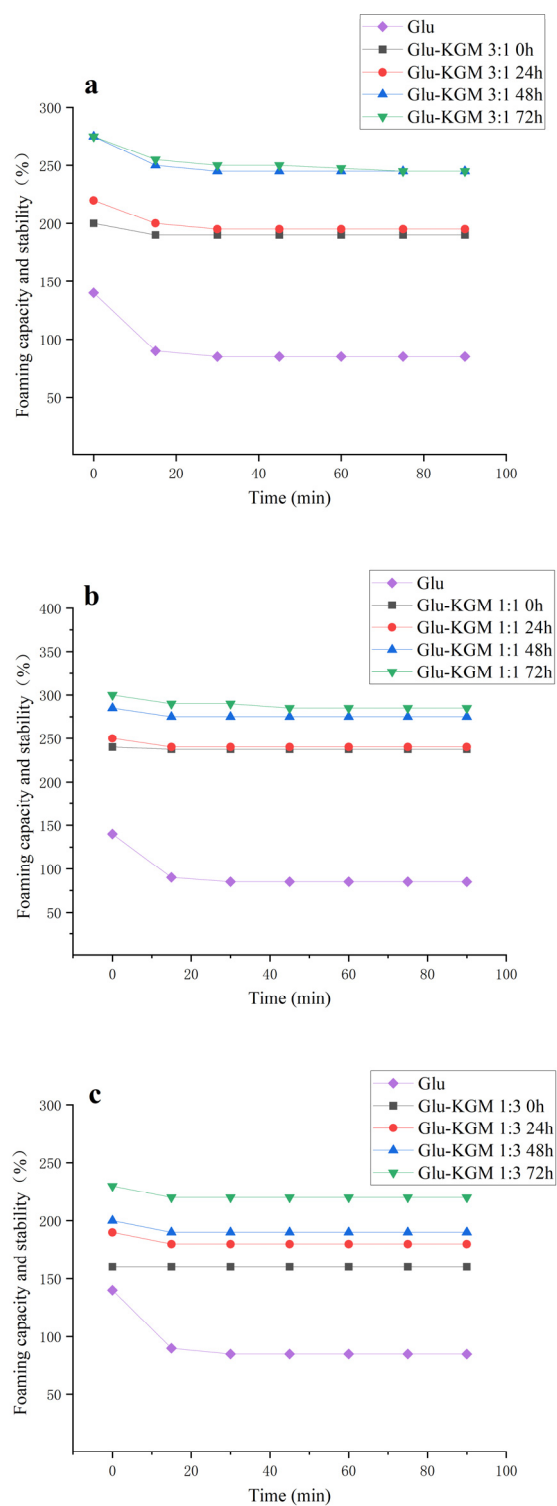

Figure S1. Foaming properties of gluten, mixtures and conjugates, respectively. a: Gluten, Glu-KGM 3:1 mixtures and conjugates; b: Gluten, Glu-KGM 1:1 mixtures and conjugates; c: Gluten, Glu-KGM 1:3 mixtures and conjugates.

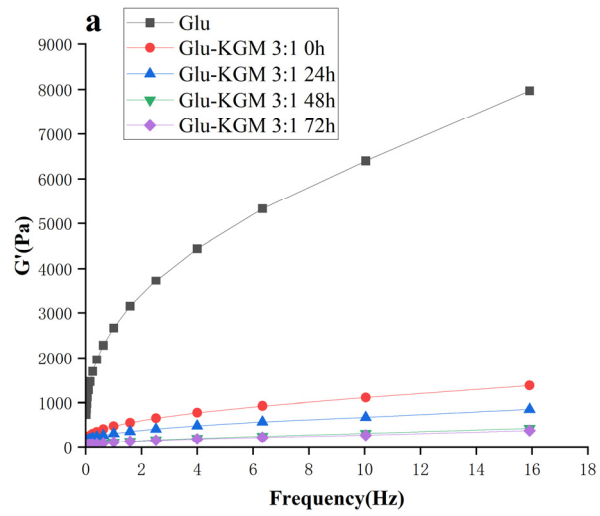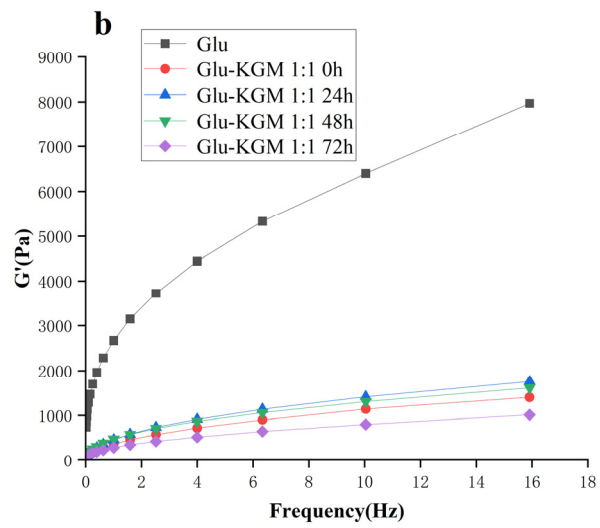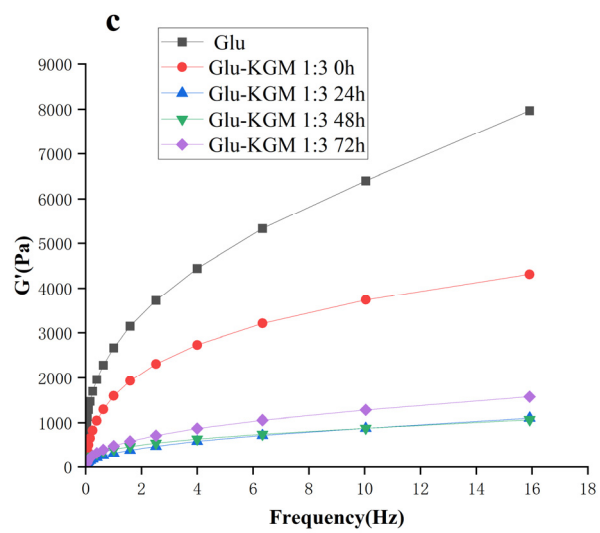

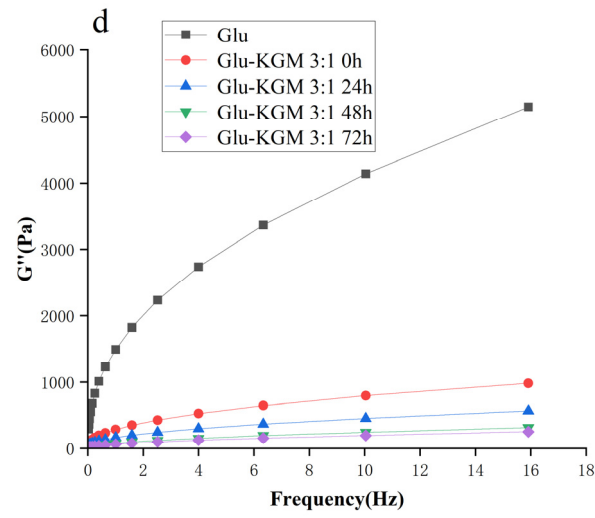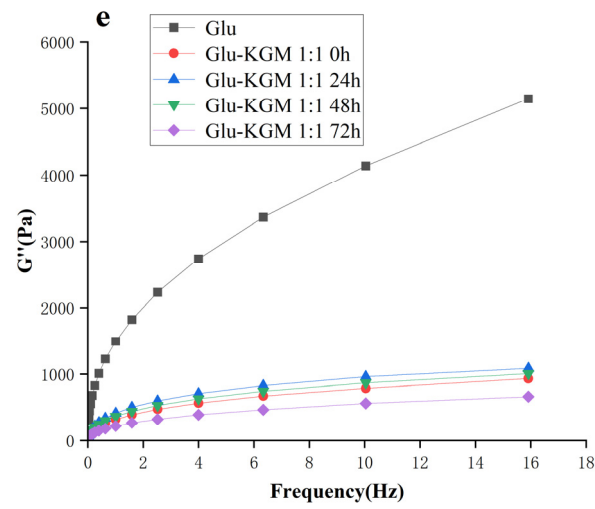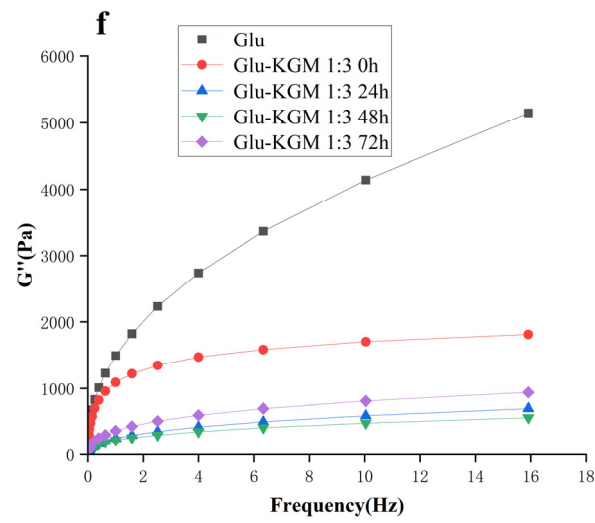

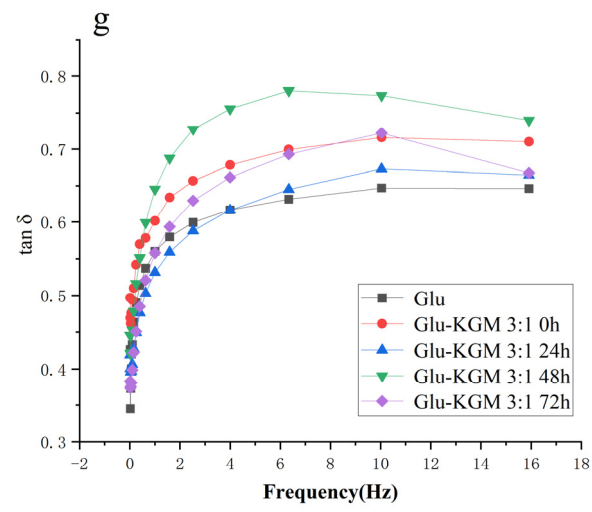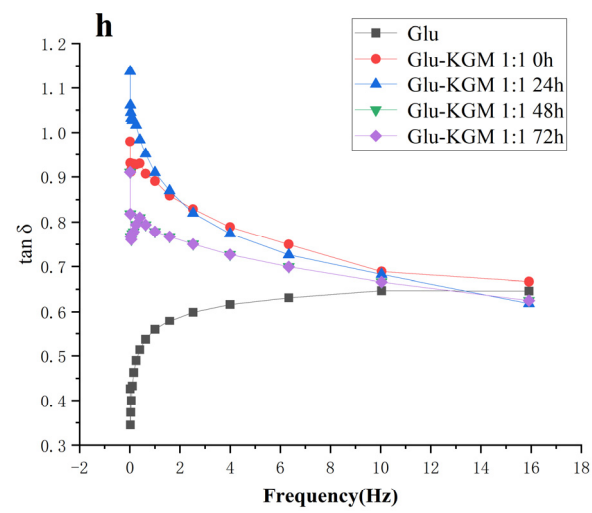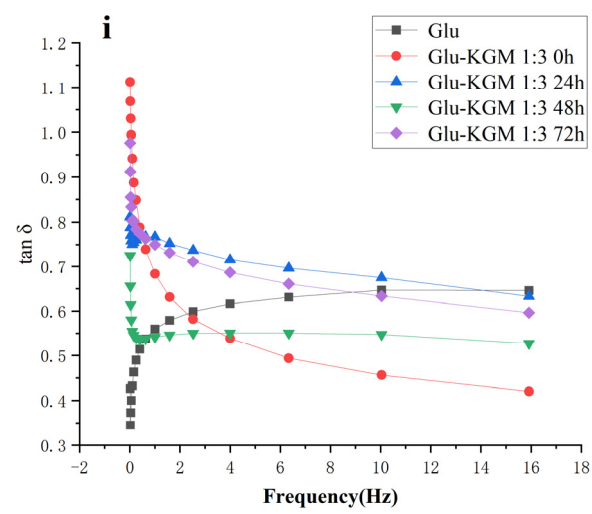

Figure. S2. Rheological properties of gluten, mixtures and conjugates, respectively.  $G'$ , elastic modulus (Figure a-c),  $G''$ , viscous modulus (Figure d-f), and  $\tan \delta$ , loss tangent (Figure g-i).

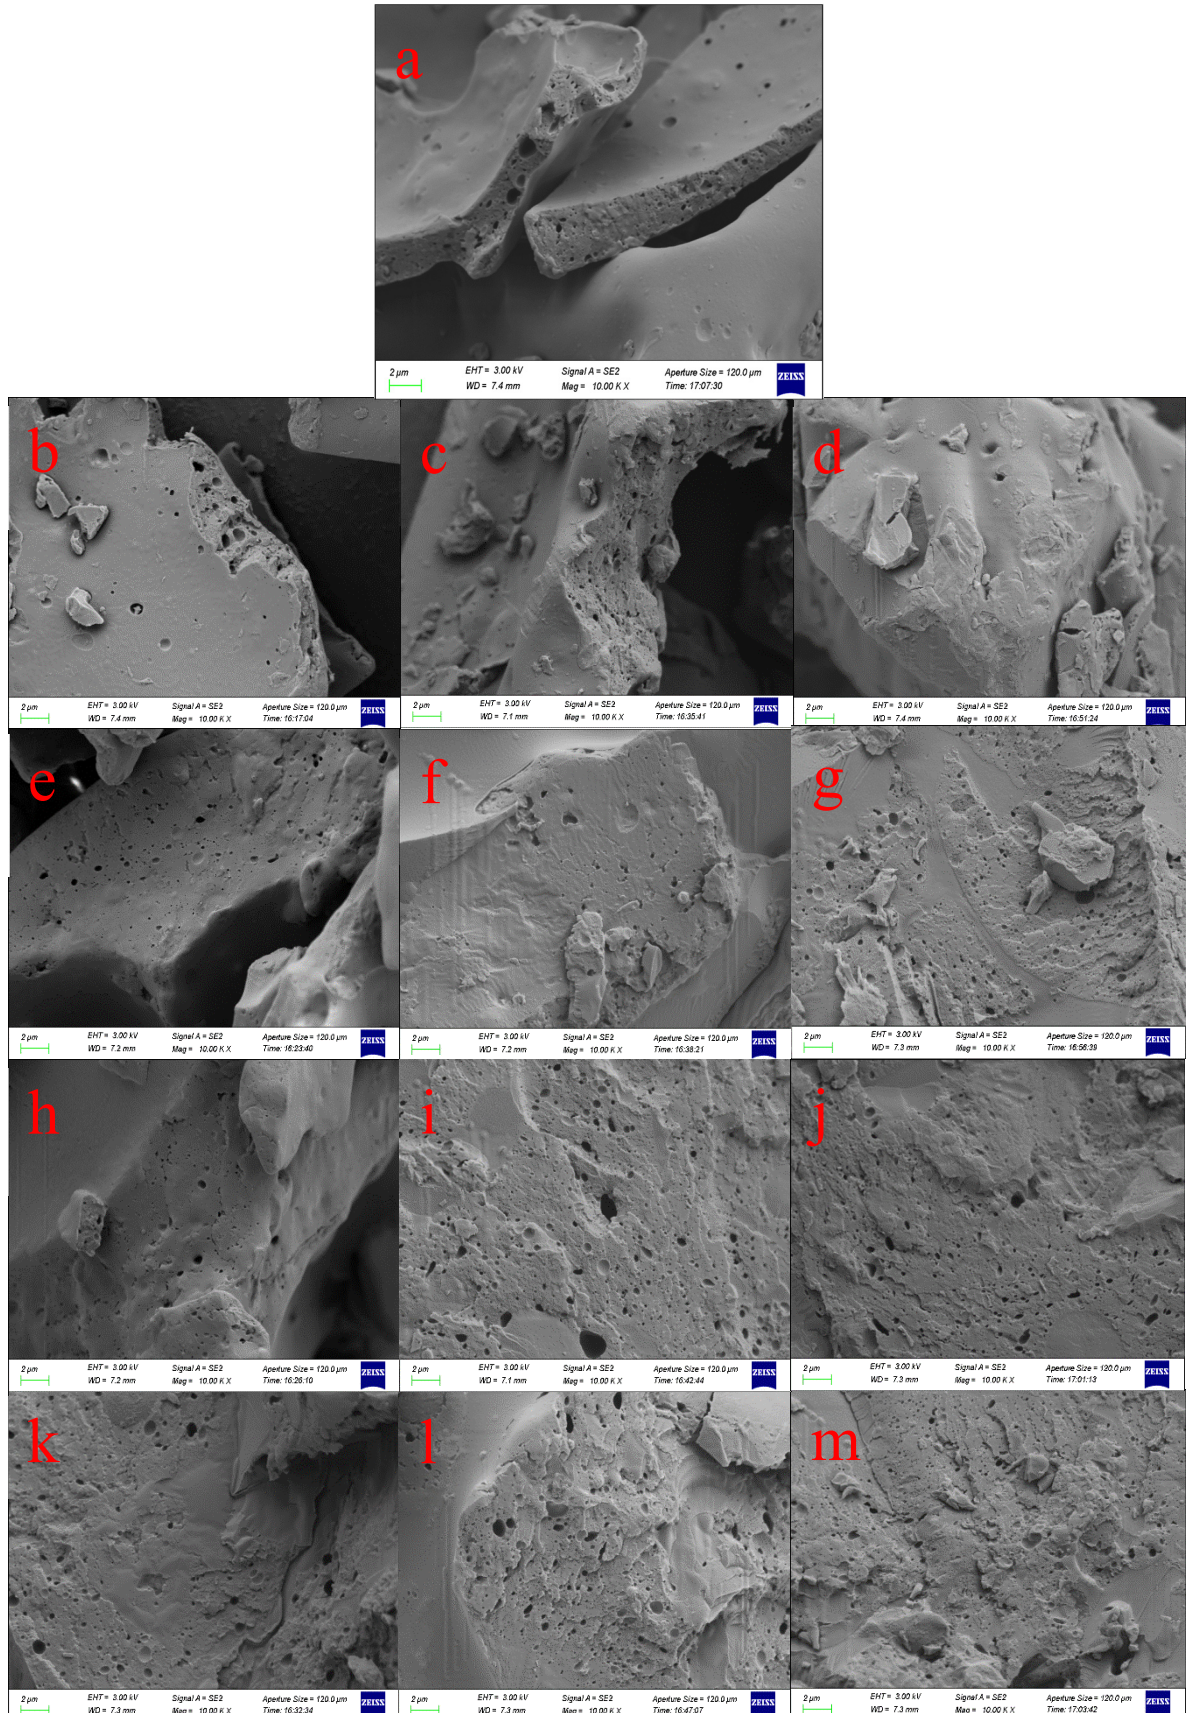

Figure S3. Electron micrograph of gluten, mixtures and conjugates, respectively. a: Gluten; b-d: Glu-KGM 3:1, Glu-KGM 1:1, and Glu-KGM 1:3 mixtures; e-g: Glu-KGM 3:1, Glu-KGM 1:1, and Glu-KGM 1:3 conjugates heated for 24h; h-j: Glu-KGM 3:1, Glu-KGM 1:1, and Glu-KGM 1:3 conjugates heated for 48h; k-m: Glu-KGM 3:1, Glu-KGM 1:1, and Glu-KGM 1:3 conjugates heated for 72h.
